# Supplementary material for: Novel strategy for high-performance supercapacitors through the polyvinylpyrrolidone (PVP)-assisted in situ growth of FeS2
Source: Royal Society of Chemistry journal article supplement (doi:10.1039/d3dt01031g), 2023-01-01
Supplement: d3dt01031g1.pdf [file d3dt01031g1.pdf]

## Supporting Information

### A Novel Strategy for High-performance Supercapacitor through Polyvinylpyrrolidone (PVP)-assisted In-situ Growth FeS<sub>2</sub>

*Muhammad Alief Irham,<sup>1,3</sup> Oktaviardi Bityasmawan Abdillah,<sup>1,3</sup> Darul Roni Rodiansyah,<sup>1</sup>  
Fakhrian Hanif Tejo Baskoro,<sup>1</sup> Haerul Fahmi,<sup>1</sup> Takashi Ogi<sup>4</sup>, Ferry Iskandar<sup>1,2,3\*</sup>*

<sup>1</sup> Department of Physics, Faculty of Mathematics and Natural Sciences, Institut Teknologi  
Bandung, Bandung 40132, Indonesia

<sup>2</sup> Research Center for Nanoscience and Nanotechnology (RCNN), Institut Teknologi Bandung,  
Jl. Ganesha 10 Bandung 40132, Indonesia

<sup>3</sup> Collaboration Research Center for Advanced Energy Materials, National Research and  
Innovation Agency - Institut Teknologi Bandung, Jalan Ganesha 10, Bandung, West Java 40132,  
Indonesia

<sup>4</sup> Chemical Engineering Program, Department of Advanced Science and Engineering, Graduate  
School of Advanced Science and Engineering, Hiroshima University, 1-4-1 Kagamiyama,  
Hiroshima, Higashihiroshima, 739-8527, Japan

[\\*Corresponding author: ferry@fi.itb.ac.id](mailto:ferry@fi.itb.ac.id)

1 **Crystallinity of Fe:S ratio**

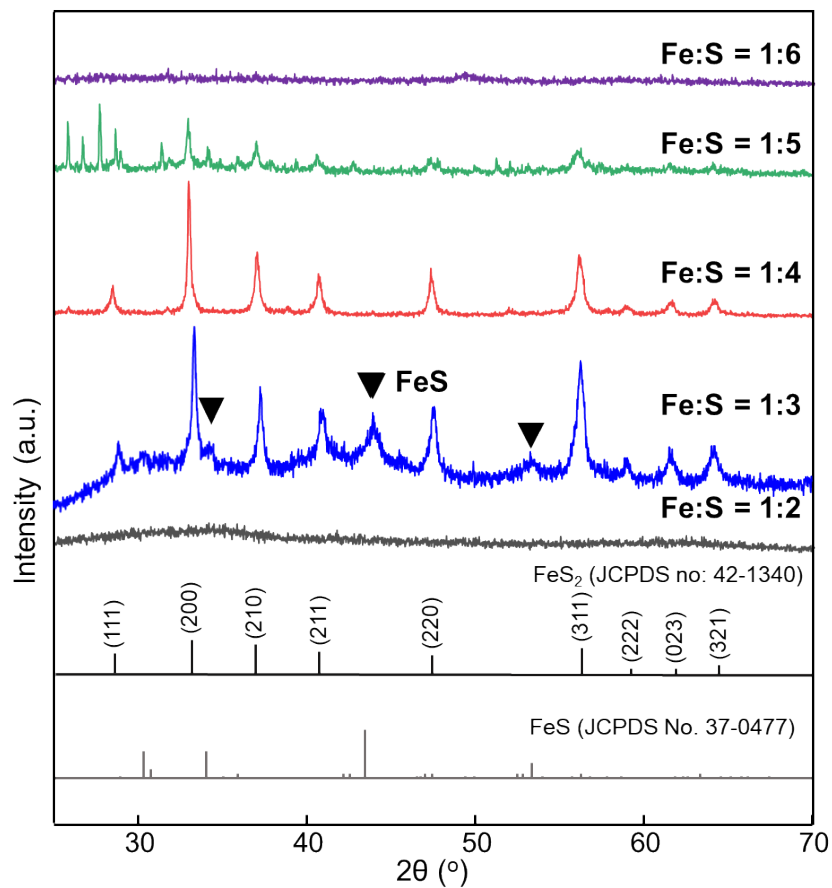

2

3 **Figure S1.** XRD peaks of FeS<sub>2</sub> with various Fe:S ratio. The Fe:S ratio of 1:4 show good  
4 crystallinity match with its JCPDS 42-1340

5

6

7

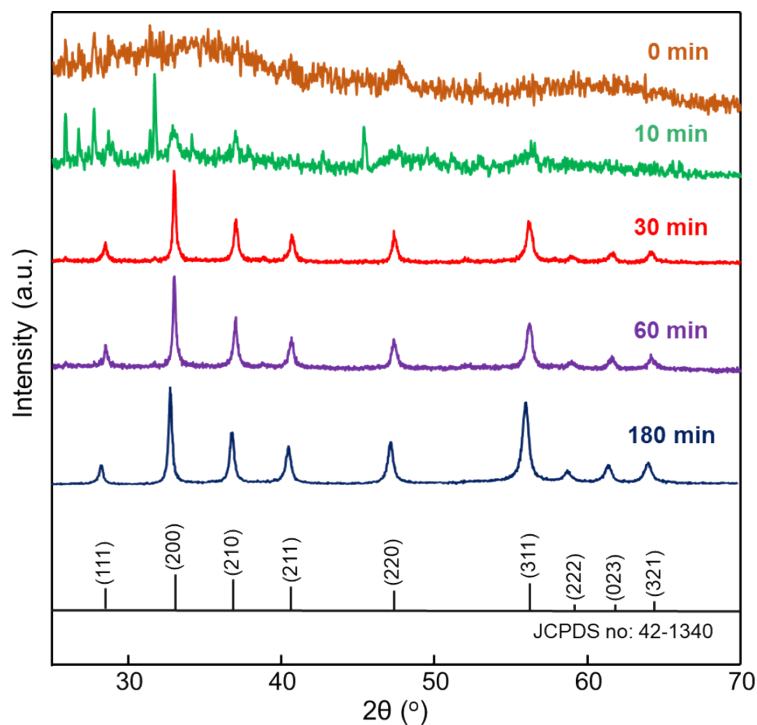

1

2 **Figure S2.** XRD peaks of FeS<sub>2</sub> with various synthesis times. Starting from 30 min the  
 3 FeS<sub>2</sub> is formed and no other peaks was observed in longer synthesis time.

4

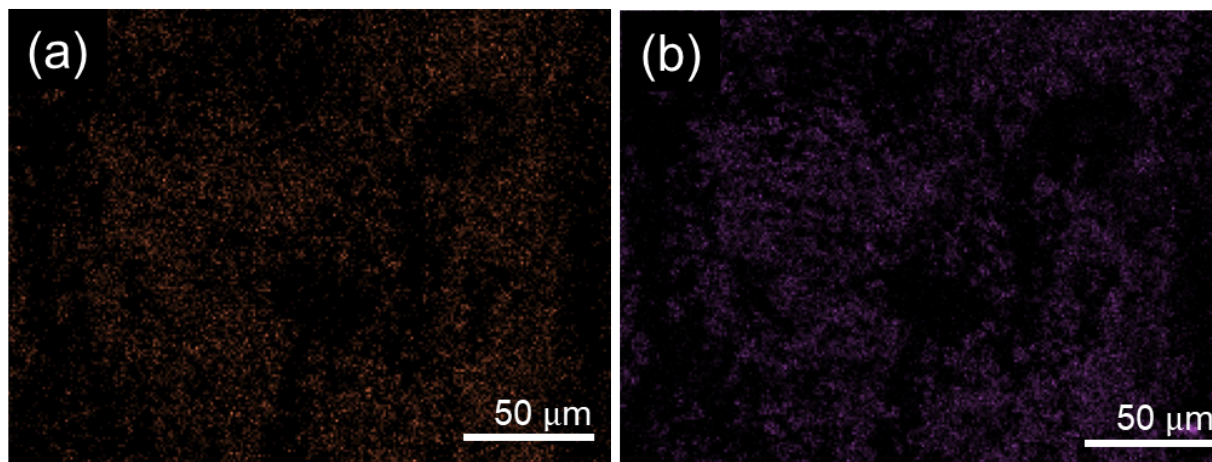

5

6 **Figure S3.** EDX mapping of (a) iron and (b) sulfur from the synthesized FeS<sub>2</sub>/NF 0wt%  
 7 corresponds to Figure 4a in main manuscript.

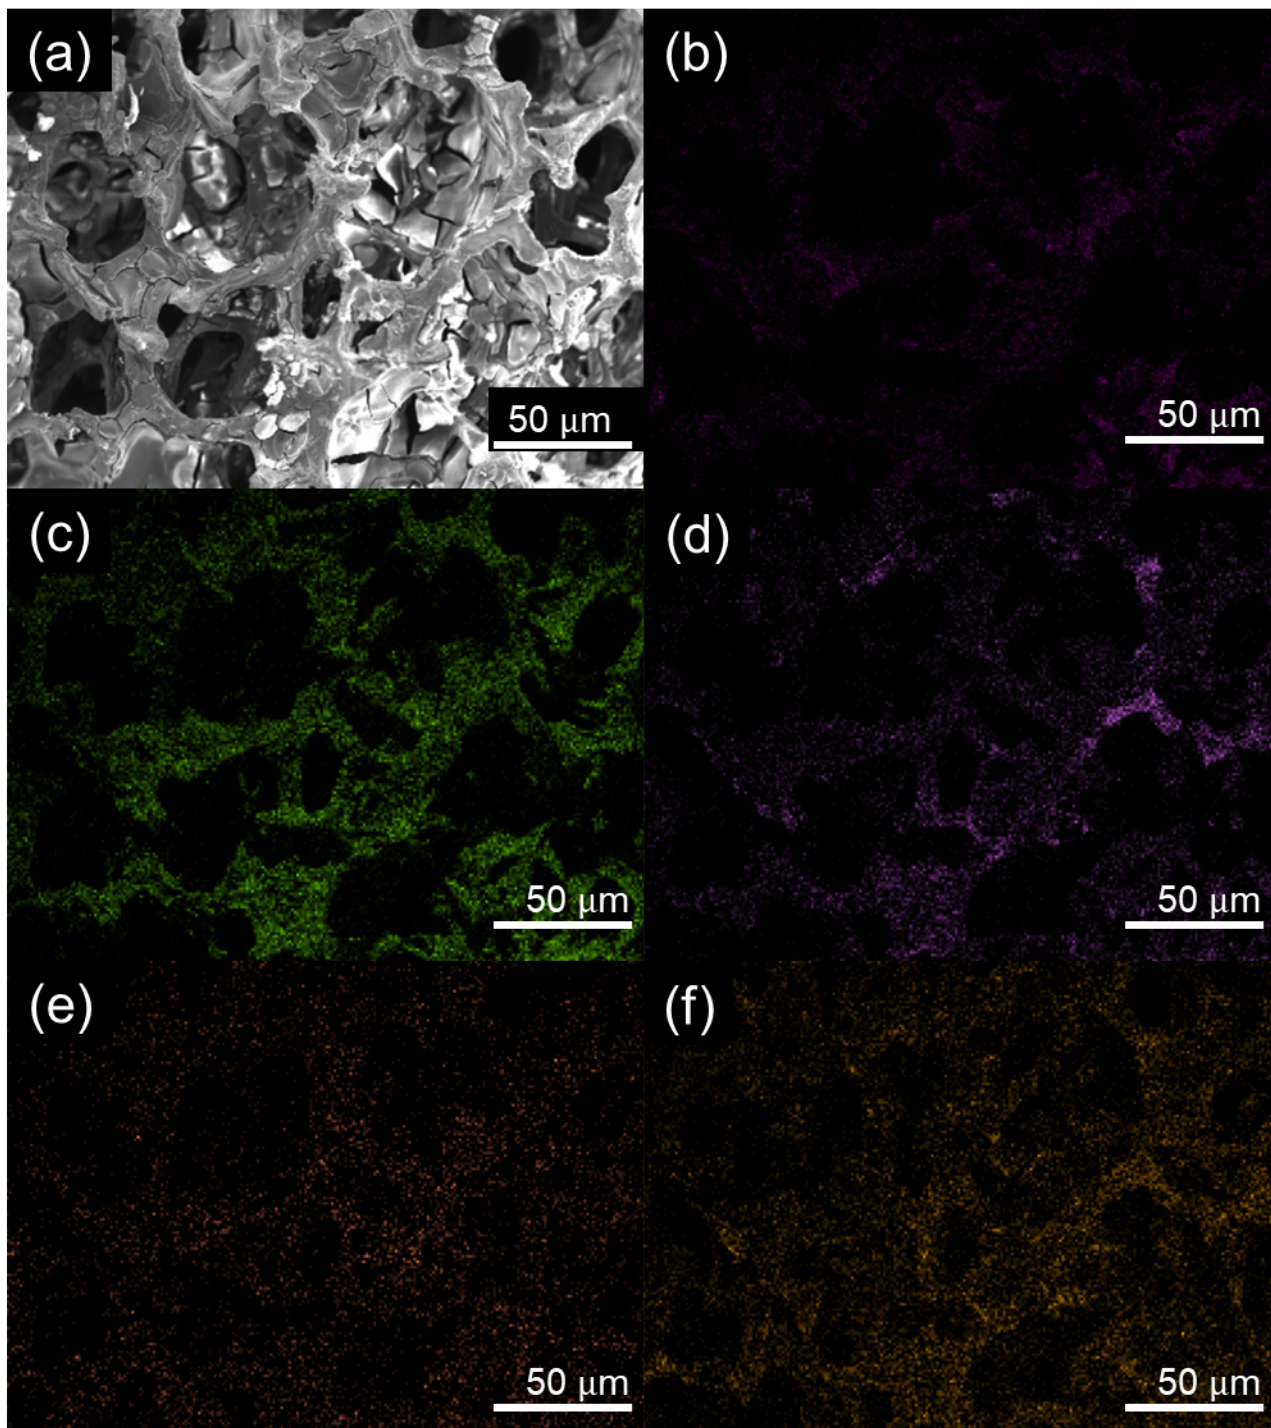

1  
2 **Figure S4.** (a) SEM images synthesized  $\text{FeS}_2/\text{PVP}$  10wt% with its EDX mapping of (b)  
3 Carbon, (c) Oxygen, (d) Sulfur, (e) Iron, and (f) Nickel.

4  
5

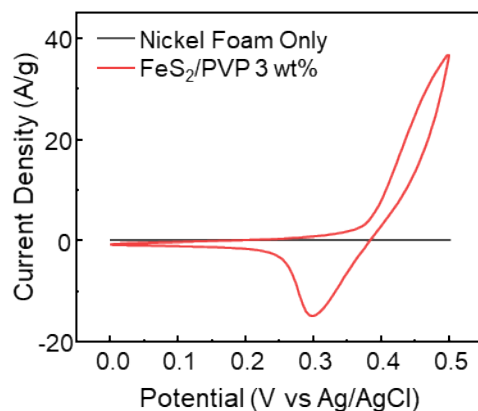

1  
2 **Figure S5.** CV comparison of FeS<sub>2</sub>/PVP 3wt% compared to the bare Nickel Foam.

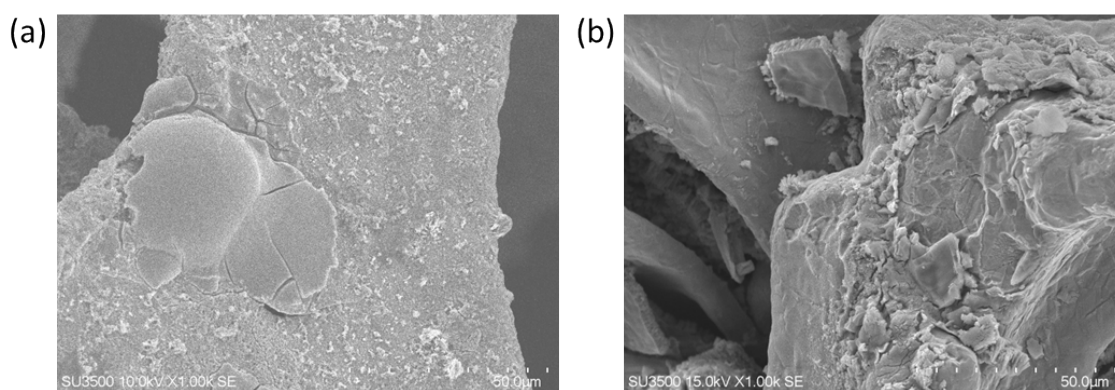

3  
4 **Figure S6.** SEM images of FeS<sub>2</sub>/PVP samples (a) before and (b) after cycling.

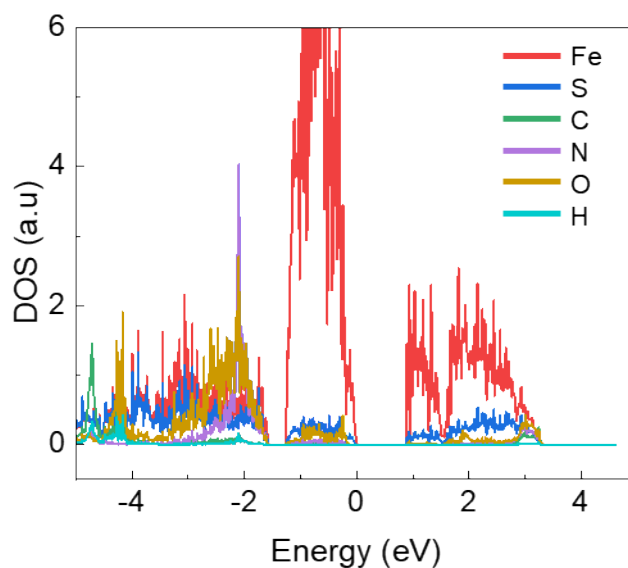

5  
6 **Figure S7.** Projected Density of States (PDOS) of FeS<sub>2</sub>/PVP slab per atom. The  
7 hybridized states between O and Fe were observed, confirming those atom hybridization.
